# Supplementary material for: Assessing biogeochemical effects and best management practice for a wheat–maize cropping system using the DNDC model
Source: Copernicus journal article supplement (doi:10.5194/bg-11-91-2014), 2014-01-07
Supplement: Supplementary file 1 [file bg-11-91-2014-supplement.pdf]

# 1 Supplementary Material

## 2 Table 1S Agricultural field management practices to facilitate the DNDC model

| Crop  | Date<br>(year-month-day) | Management <sup>a</sup>                                                                                                                                                   |
|-------|--------------------------|---------------------------------------------------------------------------------------------------------------------------------------------------------------------------|
| Wheat | 2005-10-15               | Fertilization (135 and 60 kg N ha <sup>-1</sup> as urea for treatments CT and IT, respectively, surface broadcast), tillage (20 cm) after fertilization, and wheat sowing |
|       | 2006-3-18                | Fertilization (85 and 120 kg N ha <sup>-1</sup> as urea for treatments CT and IT, respectively, soil covering 0-5 cm after band application)                              |
| Maize | 2006-6-28                | Fertilization (60 N ha <sup>-1</sup> as urea for IT treatment, soil covering 0-5 cm after hole application near plants)                                                   |
|       | 2006-7-19                | Fertilization (210 and 120 kg N ha <sup>-1</sup> as urea for treatments CT and IT, respectively, soil covering 0-5 cm after hole application near plants)                 |
| Wheat | 2006-10-15               | Fertilization (135 and 60 kg N ha <sup>-1</sup> as urea for treatments CT and IT, respectively, surface broadcast), tillage (20 cm) after fertilization, and wheat sowing |
|       | 2007-3-18                | Fertilization (85 and 120 kg N ha <sup>-1</sup> as urea for treatments CT and IT, respectively, soil covering 0-5cm after band application)                               |
| Maize | 2007-6-28                | Fertilization (60 N ha <sup>-1</sup> as urea for IT treatment, soil covering 0-5 cm after hole application near plants)                                                   |
|       | 2007-7-19                | Fertilization (210 and 120 kg N ha <sup>-1</sup> as urea for treatments CT and IT, respectively, soil covering 0-5 cm after hole application near plants)                 |
| Wheat | 2007-10-29               | Straw incorporation, tillage (20 cm), wheat sowing                                                                                                                        |
|       | 2007-12-21               | Irrigation (flooding, 145.6 mm for CT treatment)                                                                                                                          |
|       | 2007-12-22               | Irrigation (sprinkler, 81.5 mm for IT treatment)                                                                                                                          |
|       | 2008-3-18                | Fertilization (85 and 120 kg N ha <sup>-1</sup> as urea for treatments CT and IT, respectively, soil covering 0-5cm after band application)                               |
|       | 2008-3-21                | Irrigation (flooding, 118.0 mm for CT treatment)                                                                                                                          |
|       | 2008-3-22                | Irrigation (sprinkler, 62.6 mm for IT treatment)                                                                                                                          |
|       | 2008-6-2                 | Wheat harvest                                                                                                                                                             |
| Maize | 2008-6-5                 | Straw incorporation                                                                                                                                                       |
|       | 2008-6-6                 | Tillage (20 cm ) and maize sowing                                                                                                                                         |
|       | 2008-6-8                 | Irrigation (sprinkler,100.5mm)                                                                                                                                            |
|       | 2008-7-19                | Fertilization (210 and 120 kg N ha <sup>-1</sup> as urea for treatments CT and IT, soil covering 0-5 cm after hole application near plants)                               |
|       | 2008-8-10                | Irrigation (sprinkler, 27.8 and 28.6 mm for treatment CT and                                                                                                              |

|       |                        |                                                                                                                                                                                                                                        |
|-------|------------------------|----------------------------------------------------------------------------------------------------------------------------------------------------------------------------------------------------------------------------------------|
|       |                        | IT, respectively)                                                                                                                                                                                                                      |
|       | 2008-10-8              | Maize harvest                                                                                                                                                                                                                          |
| Wheat | 2008-10-14             | Straw incorporation for WS treatment                                                                                                                                                                                                   |
|       | 2008-10-15             | Fertilization (10.5 kg N ha <sup>-1</sup> in urea and 49.5 kg N ha <sup>-1</sup> in diammonium phosphate, surface broadcast), tillage (20 cm) after fertilization, and wheat sowing                                                    |
|       | 2008-12-18             | Irrigation (sprinkler, 58.2 mm)                                                                                                                                                                                                        |
|       | 2009-3-6               | Fertilization (120 kg N ha <sup>-1</sup> as urea, soil covering 0-5cm after band application)                                                                                                                                          |
|       | 2009-3-15              | Irrigation (sprinkler, 89.4 mm)                                                                                                                                                                                                        |
|       | 2009-4-19              | Irrigation (sprinkler, 93.6 mm)                                                                                                                                                                                                        |
|       | 2009-6-4               | Wheat harvest                                                                                                                                                                                                                          |
| Maize | 2009-6-5               | Straw incorporation for WS treatment                                                                                                                                                                                                   |
|       | 2009-6-6               | Tillage (20 cm ) and maize sowing                                                                                                                                                                                                      |
|       | 2009-6-10              | Irrigation (sprinkler, 41.9 mm)                                                                                                                                                                                                        |
|       | 2009-7-11              | Fertilization (210 kg N ha <sup>-1</sup> as urea, soil covering 0-5 cm after hole application near plants)                                                                                                                             |
|       | 2009-7-17              | Irrigation (sprinkler, 65.0 mm)                                                                                                                                                                                                        |
|       | 2009-8-14              | Irrigation (sprinkler, 21.3mm)                                                                                                                                                                                                         |
|       | 2009-10-14             | Maize harvest                                                                                                                                                                                                                          |
| Wheat | 2009-10-17             | Straw incorporation                                                                                                                                                                                                                    |
|       | 2009-10-21             | Fertilization (20, 40, 60, 100, 150, 60, 60 and 60 kg N ha <sup>-1</sup> as urea for treatments N135, N270, N430, N650, N850, U, DCD and DMPP, respectively, surface broadcast), tillage (20 cm) after fertilization, and wheat sowing |
|       | 2010-1-9               | Irrigation (sprinkler, 89.4 mm)                                                                                                                                                                                                        |
|       | 2010-3-18              | Fertilization (40, 80, 120, 200, 250, 120, 120 and 120 kg N ha <sup>-1</sup> as urea for treatments N135, N270, N430, N650, N850, U, DCD and DMPP, respectively, soil covering 0-5 cm after band application)                          |
|       | 2010-3-23 <sup>b</sup> | Irrigation (sprinkler, 86.7 mm)                                                                                                                                                                                                        |
|       | 2010-5-4 <sup>c</sup>  | Irrigation (sprinkler, 77.6 mm)                                                                                                                                                                                                        |
|       | 2010-6-15              | Wheat harvest                                                                                                                                                                                                                          |
| Maize | 2010-6-16              | Straw incorporation                                                                                                                                                                                                                    |
|       | 2010-6-17              | Tillage (20 cm ) and maize sowing                                                                                                                                                                                                      |
|       | 2010-6-18 <sup>d</sup> | Irrigation (sprinkler, 60.5 mm)                                                                                                                                                                                                        |
|       | 2010-7-13              | Fertilization (75, 150, 250, 350, 450, 250, 250 and 250 kg N ha <sup>-1</sup> as urea for treatments N135, N270, N430, N650, N850, U, DCD and DMPP, respectively, soil covering 0-5 cm after band application)                         |
|       | 2010-8-7 <sup>e</sup>  | Irrigation (sprinkler, 93.5 mm)                                                                                                                                                                                                        |
|       | 2010-10-14             | Maize harvest                                                                                                                                                                                                                          |

- 1 <sup>a</sup> Only the fertilizer application rate and approximate time were recorded from  
2 October 2005 to October 2007, while other management practices such as sowing,

- 1 irrigation and harvest were not available, so we simply used the management
- 2 practices from October 2007 to October 2008 to substitute for them.
- 3 <sup>b</sup> 2010-3-23 (19:00) ~ 2010-3-24 (14:00)
- 4 <sup>c</sup> 2010-5-4 (07:00) ~ 2010-5-5 (19:00)
- 5 <sup>d</sup> 2010-6-18 (23:00) ~ 2010-6-19 (10:00)
- 6 <sup>e</sup> 2010-8-7 (08:00) ~ 2010-8-9 (14:00)

1 Table 2S Observed and simulated grain yields (GY) for wheat season (WS) and maize  
 2 season (MS) and annual emissions of N<sub>2</sub>O, NO and CH<sub>4</sub>.

| Treatment       | Observed        |             |                               |             |                 | Simulated       |      |                               |      |                 |
|-----------------|-----------------|-------------|-------------------------------|-------------|-----------------|-----------------|------|-------------------------------|------|-----------------|
|                 | GY <sup>a</sup> |             | Annual emissions <sup>b</sup> |             |                 | GY <sup>a</sup> |      | Annual emissions <sup>b</sup> |      |                 |
|                 | WS              | MS          | N <sub>2</sub> O              | NO          | CH <sub>4</sub> | WS              | MS   | N <sub>2</sub> O              | NO   | CH <sub>4</sub> |
| CT <sup>c</sup> | 2.55 (0.13)     | 2.30 (0.09) |                               |             |                 | 2.30            | 2.26 |                               |      |                 |
| IT <sup>c</sup> | 2.44 (0.06)     | 2.62 (0.06) |                               |             |                 | 2.27            | 2.42 |                               |      |                 |
| CT <sup>d</sup> | 1.94 (0.05)     | 3.52 (0.16) |                               |             |                 | 2.05            | 3.24 |                               |      |                 |
| IT <sup>d</sup> | 1.92 (0.08)     | 3.77 (0.07) |                               |             |                 | 2.08            | 3.24 |                               |      |                 |
| CT <sup>e</sup> | 2.48 (0.11)     | 3.37 (0.16) |                               |             |                 | 2.41            | 3.05 |                               |      |                 |
| IT <sup>e</sup> | 2.47 (0.10)     | 3.69 (0.35) |                               |             |                 | 2.51            | 2.97 |                               |      |                 |
| WS              | 2.40 (0.14)     | 3.17 (0.18) | 4.45 (0.69)                   | 2.49 (0.45) |                 | 2.56            | 3.04 | 3.88                          | 2.42 |                 |
| NS              | 2.19 (0.07)     | 3.21 (0.23) | 3.46 (0.44)                   | 2.40 (0.40) |                 | 2.58            | 3.04 | 2.85                          | 2.42 |                 |
| U               | 2.67 (0.04)     | 3.03 (0.20) | 4.49 (0.21)                   | 2.27 (0.37) |                 | 2.55            | 3.25 | 4.37                          | 1.90 |                 |
| DCD             | 2.56 (0.03)     | 3.01 (0.39) | 2.93 (0.06)                   | 0.86 (0.15) |                 | 2.57            | 3.25 | 3.03                          | 0.93 |                 |
| DMPP            | 2.84 (0.26)     | 3.22 (0.19) | 2.78 (0.16)                   | 0.82 (0.12) |                 | 2.55            | 3.25 | 2.67                          | 0.88 |                 |
| N135            | 2.51 (0.16)     | 2.61 (0.40) | 2.09 (0.20)                   | 0.91 (0.14) | -1.59 (0.04)    | 2.46            | 3.05 | 2.74                          | 1.18 | -1.84           |
| N270            | 2.56 (0.13)     | 3.02 (0.36) | 2.59 (0.33)                   | 1.21 (0.08) | -1.56 (0.04)    | 2.55            | 3.25 | 3.50                          | 1.37 | -1.84           |
| N430            | 2.71 (0.18)     | 3.11 (0.44) | 3.51 (0.26)                   | 1.75 (0.06) | -1.51 (0.09)    | 2.56            | 3.25 | 4.41                          | 1.92 | -1.83           |
| N650            | 3.07 (0.32)     | 3.43 (0.50) | 5.12 (0.78)                   | 2.23 (0.17) | -1.69 (0.10)    | 2.56            | 3.25 | 5.83                          | 2.80 | -1.84           |
| N850            | 2.74 (0.20)     | 3.70 (0.36) | 5.57 (0.68)                   | 2.64 (0.35) | -1.79 (0.07)    | 2.56            | 3.25 | 6.95                          | 3.18 | -1.84           |

3 <sup>a</sup> Mg C ha<sup>-1</sup> yr<sup>-1</sup>; <sup>b</sup> kg C or N ha<sup>-1</sup> yr<sup>-1</sup>; <sup>c</sup> 2005-2006 rotation; <sup>d</sup> 2006-2007 rotation; <sup>e</sup>  
 4 2007-2008 rotation. Treatment code definitions are found in Table 1 and in the text.
